# Supplementary material
Source: Springer Nature journal article supplement (https://www.springermedizin.de/resource/supplementary/13048_2013_194_MOESM2_ESM.pdf/9665082)
Supplement: MOESM2 [file 9665082]

Vascular permeability  
( $\mu\text{g EB}/\text{mg tissue}$ )

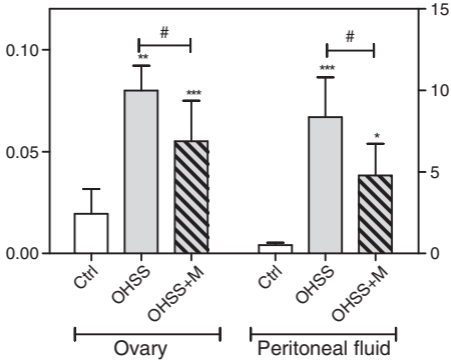

Vascular permeability  
( $\mu\text{g EB}/\text{mL peritoneal fluid}$ )
